# Supplementary material for: Edaravone containing isoindoline nitroxides for the potential treatment of cardiovascular ischaemia
Source: Royal Society of Chemistry journal article supplement (doi:10.1039/c1md00041a), 2011-01-01

## SUPPORTING INFORMATION

# Edaravone Containing Isoindoline Nitroxides for Potential Treatment of Cardiovascular Ischaemia

James R. Walker,<sup>a,b</sup> Kathryn E. Fairfull-Smith,<sup>a,b</sup> Kazunori Anzai,<sup>c</sup> Shannen Lau,<sup>d</sup> Paul J. White,<sup>d</sup> Peter J. Scammells<sup>a,d</sup> and Steven E. Bottle<sup>a,b,\*</sup>

<sup>a</sup>ARC Centre of Excellence for Free Radical Chemistry and Biotechnology.

<sup>b</sup>Chemistry Discipline, Faculty of Science and Technology, Queensland University of Technology, QLD, 4001, Australia. Fax: 61 7 3138 1804; Tel: +61 7 3138 1356; E-mail: [s.bottle@qut.edu.au](mailto:s.bottle@qut.edu.au)

<sup>c</sup>Nihon Pharmaceutical University, 10281 Komura, Ina-machi, Kitaaachi-gun, Saitama 362-0806, Japan.

<sup>d</sup>Medicinal Chemistry and Drug Action, Monash Institute of Pharmaceutical Sciences, Monash University, 381 Royal Parade, Parkville, VIC, 3052, Australia.

### Table of contents

|                                                                                                                                                                                                                                                         |    |
|---------------------------------------------------------------------------------------------------------------------------------------------------------------------------------------------------------------------------------------------------------|----|
| <b>Figure S1.</b> 5-(3-Methyl-pyrazol-5-ol-1-yl)-1,1,3,3-tetramethylisoindolin-2-yloxyl <b>7</b> , EI-mass spectrum.....                                                                                                                                | S2 |
| <b>Figure S2.</b> 5-(3-Methyl-pyrazol-5-ol-1-yl)-1,1,3,3-tetramethylisoindolin-2-yloxyl <b>7</b> , analytical HPLC chromatogram .....                                                                                                                   | S3 |
| <b>Figure S3.</b> 5-(3-Methyl-pyrazol-5-ol-1-yl)-2-methoxy-1,1,3,3-tetramethylisoindoline <b>10</b> , <sup>1</sup> H NMR spectrum (400 MHz, CDCl <sub>3</sub> ) .....                                                                                   | S4 |
| <b>Figure S4.</b> 5-(3-Methyl-pyrazol-5-ol-1-yl)-2-methoxy-1,1,3,3-tetramethylisoindoline <b>10</b> , <sup>13</sup> C NMR spectrum (100 MHz, CDCl <sub>3</sub> ) .....                                                                                  | S5 |
| <b>Figure S5.</b> 5-(3-Methyl-pyrazol-5-ol-1-yl)-2-methoxy-1,1,3,3-tetramethylisoindoline <b>10</b> , <sup>13</sup> C DEPT NMR spectrum (100 MHz, CDCl <sub>3</sub> ) .....                                                                             | S6 |
| <b>Figure S6.</b> 5-(3-Methyl-pyrazol-5-ol-1-yl)-2-methoxy-1,1,3,3-tetramethylisoindoline <b>10</b> , EI-mass spectrum.....                                                                                                                             | S7 |
| <b>Figure S7.</b> 5-(3-Methyl-pyrazol-5-ol-1-yl)-2-methoxy-1,1,3,3-tetramethylisoindoline <b>10</b> , analytical HPLC chromatogram .....                                                                                                                | S8 |
| <b>Figure S8.</b> Comparison of <sup>13</sup> C DEPT NMR spectra (100 MHz, CDCl <sub>3</sub> ) for 5-(3-methyl-pyrazol-5-ol-1-yl)-2-methoxy-1,1,3,3-tetramethylisoindoline <b>10</b> and edaravone (3-methyl-1-phenyl-2-pyridazin-5-one) <b>1</b> ..... | S9 |

**Figure S1.** 5-(3-Methyl-pyrazol-5-ol-1-yl)-1,1,3,3-tetramethylisoindolin-2-yloxyl **7**, EI-mass spectrum

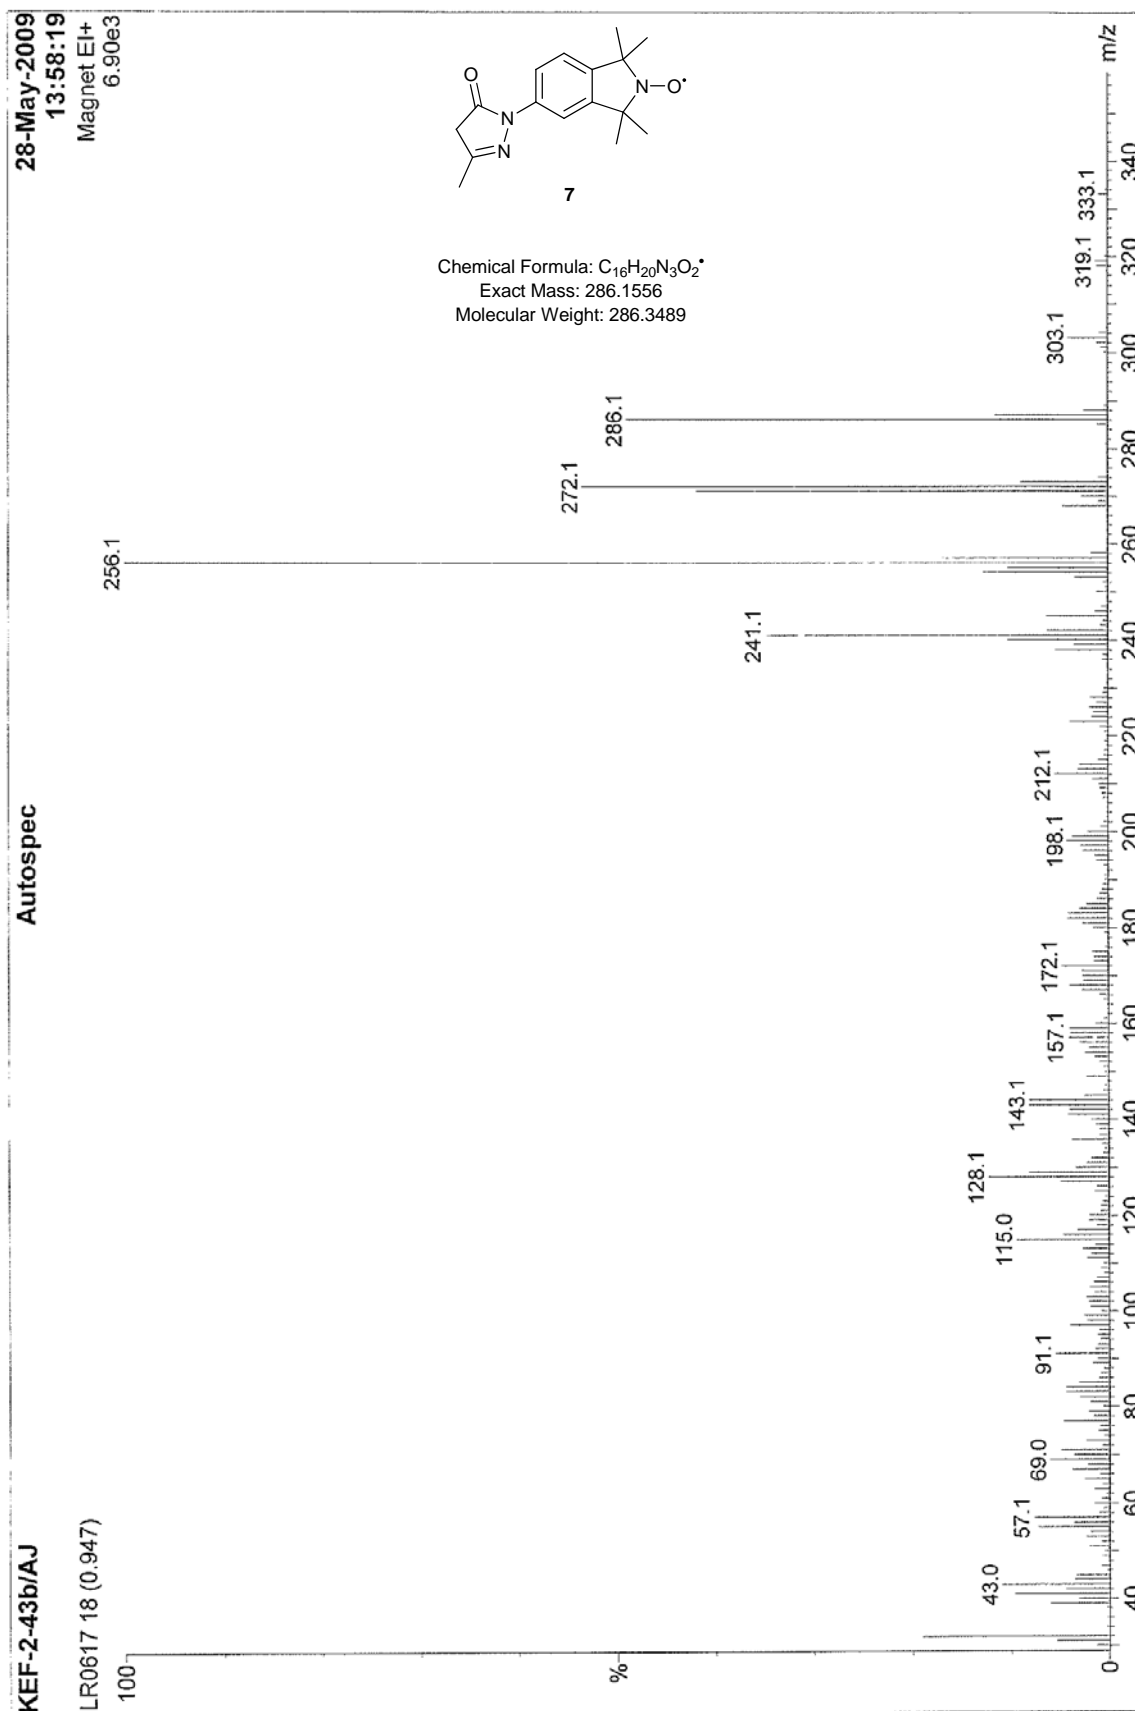

**Figure S2.** 5-(3-Methyl-pyrazol-5-yl-1-yl)-1,1,3,3-tetramethylisindolin-2-yloxy **7**,  
analytical HPLC chromatogram

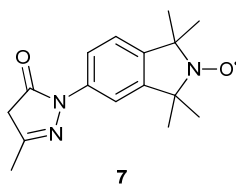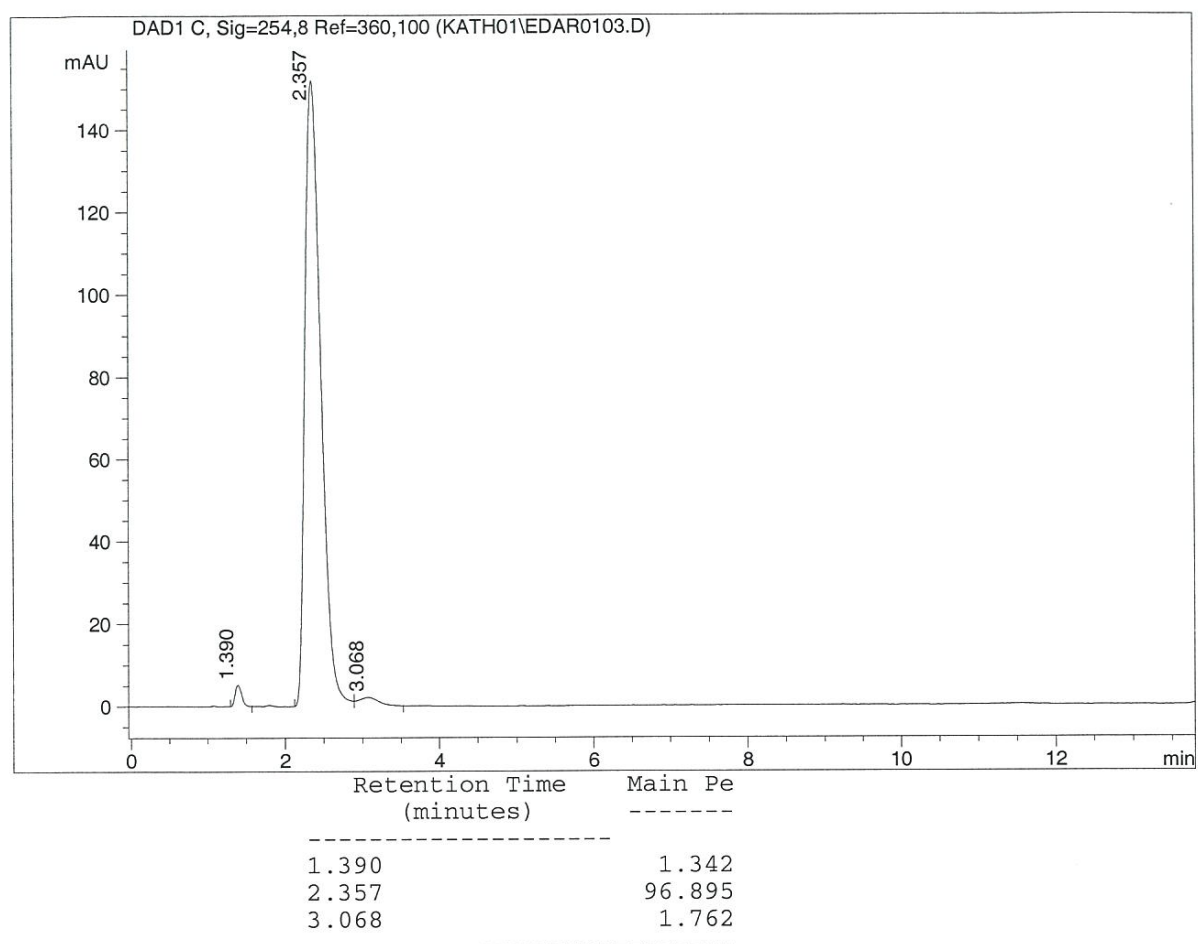

**Figure S3.** 5-(3-Methyl-pyrazol-5-ol-1-yl)-2-methoxy-1,1,3,3-tetramethylisoindoline **10**,  $^1\text{H}$  NMR spectrum (400 MHz,  $\text{CDCl}_3$ )

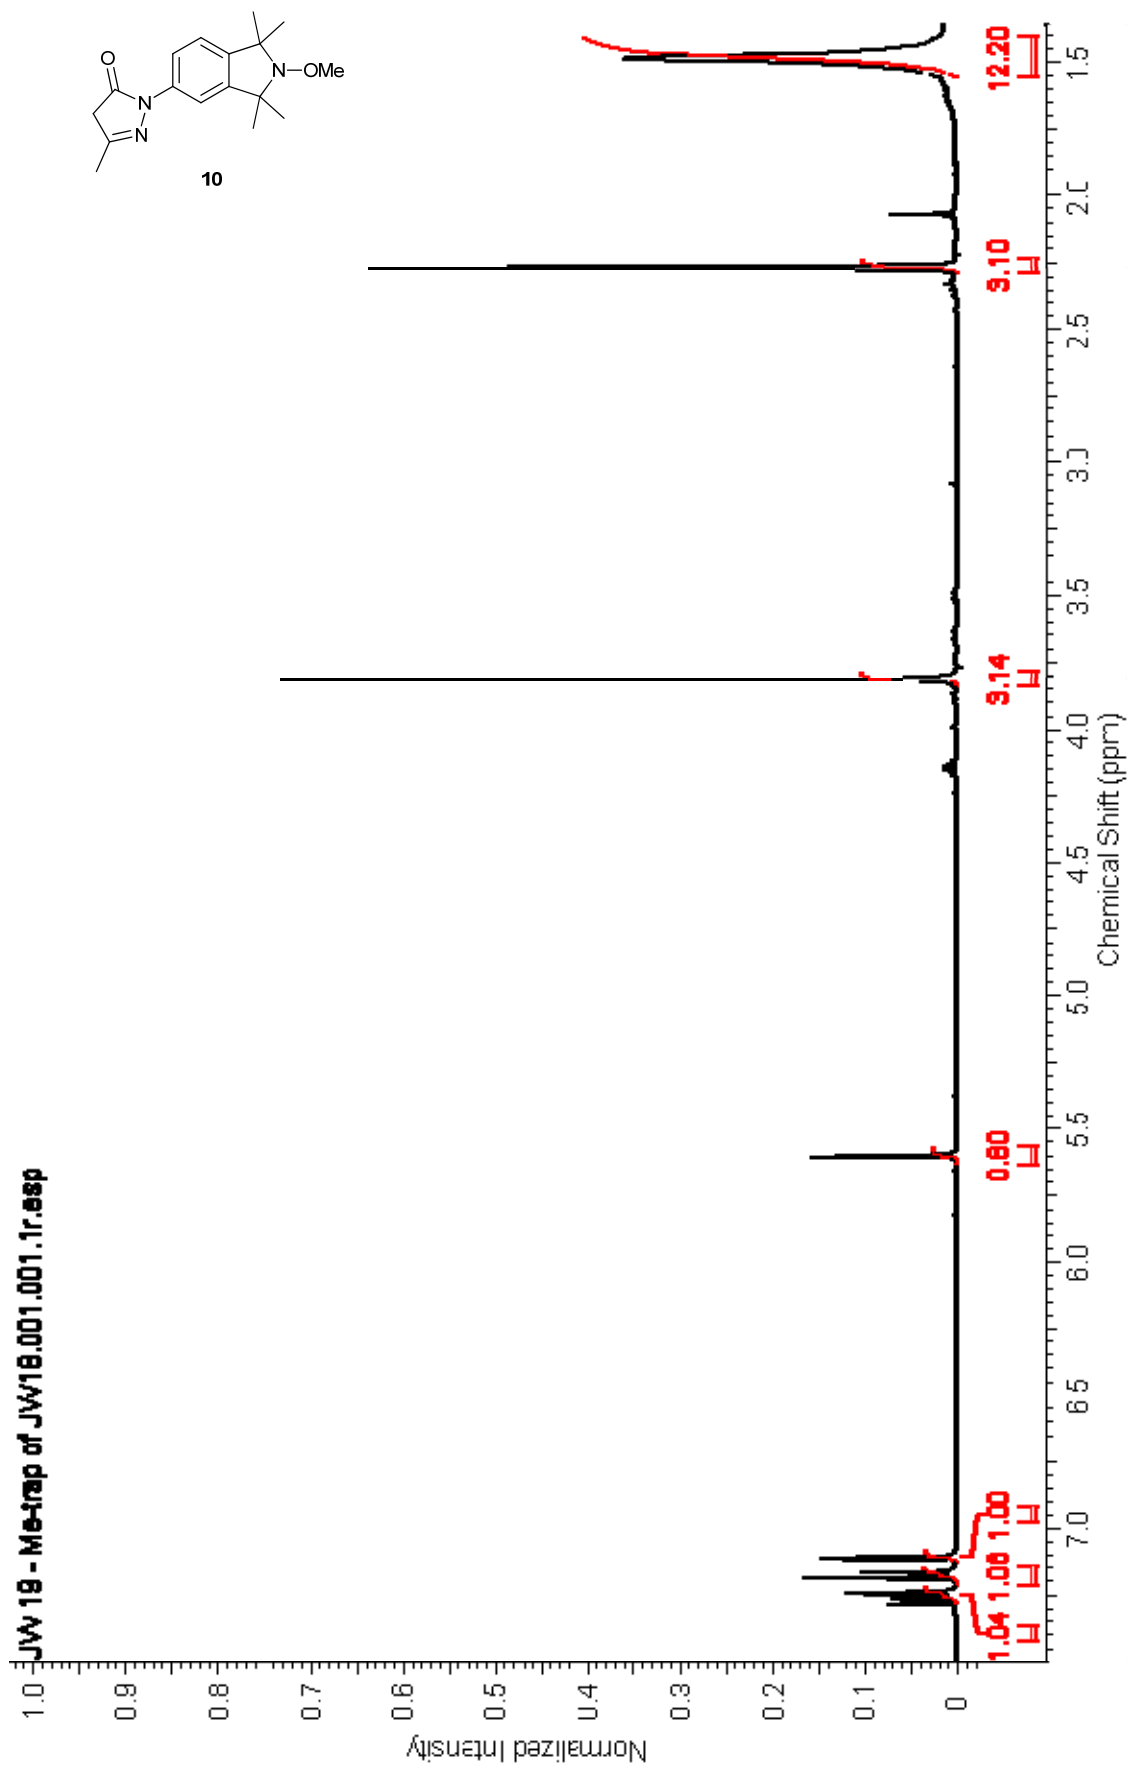

**Figure S4.** 5-(3-Methyl-pyrazol-5-ol-1-yl)-2-methoxy-1,1,3,3-tetramethylisoindoline **10**,  $^{13}\text{C}$  NMR spectrum (100 MHz,  $\text{CDCl}_3$ )

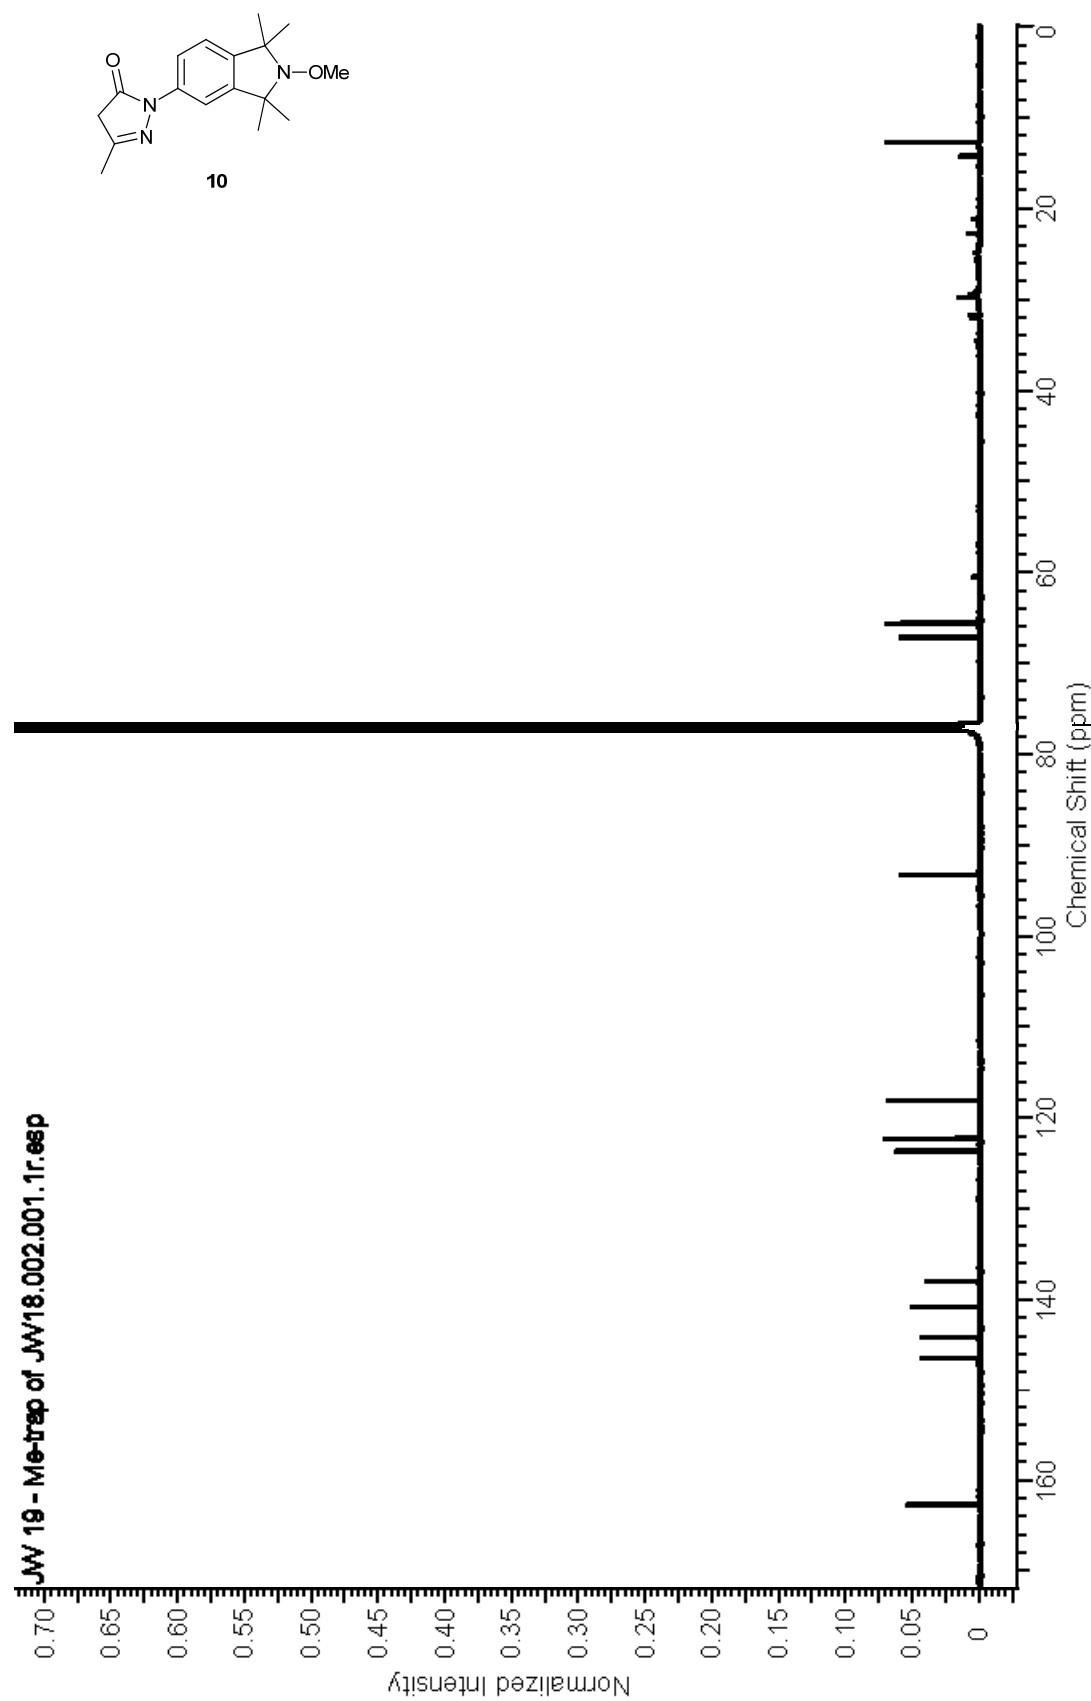

**Figure S5.** 5-(3-Methyl-pyrazol-5-ol-1-yl)-2-methoxy-1,1,3,3-tetramethylisoindoline **10**,  $^{13}\text{C}$  DEPT NMR spectrum (100 MHz,  $\text{CDCl}_3$ )

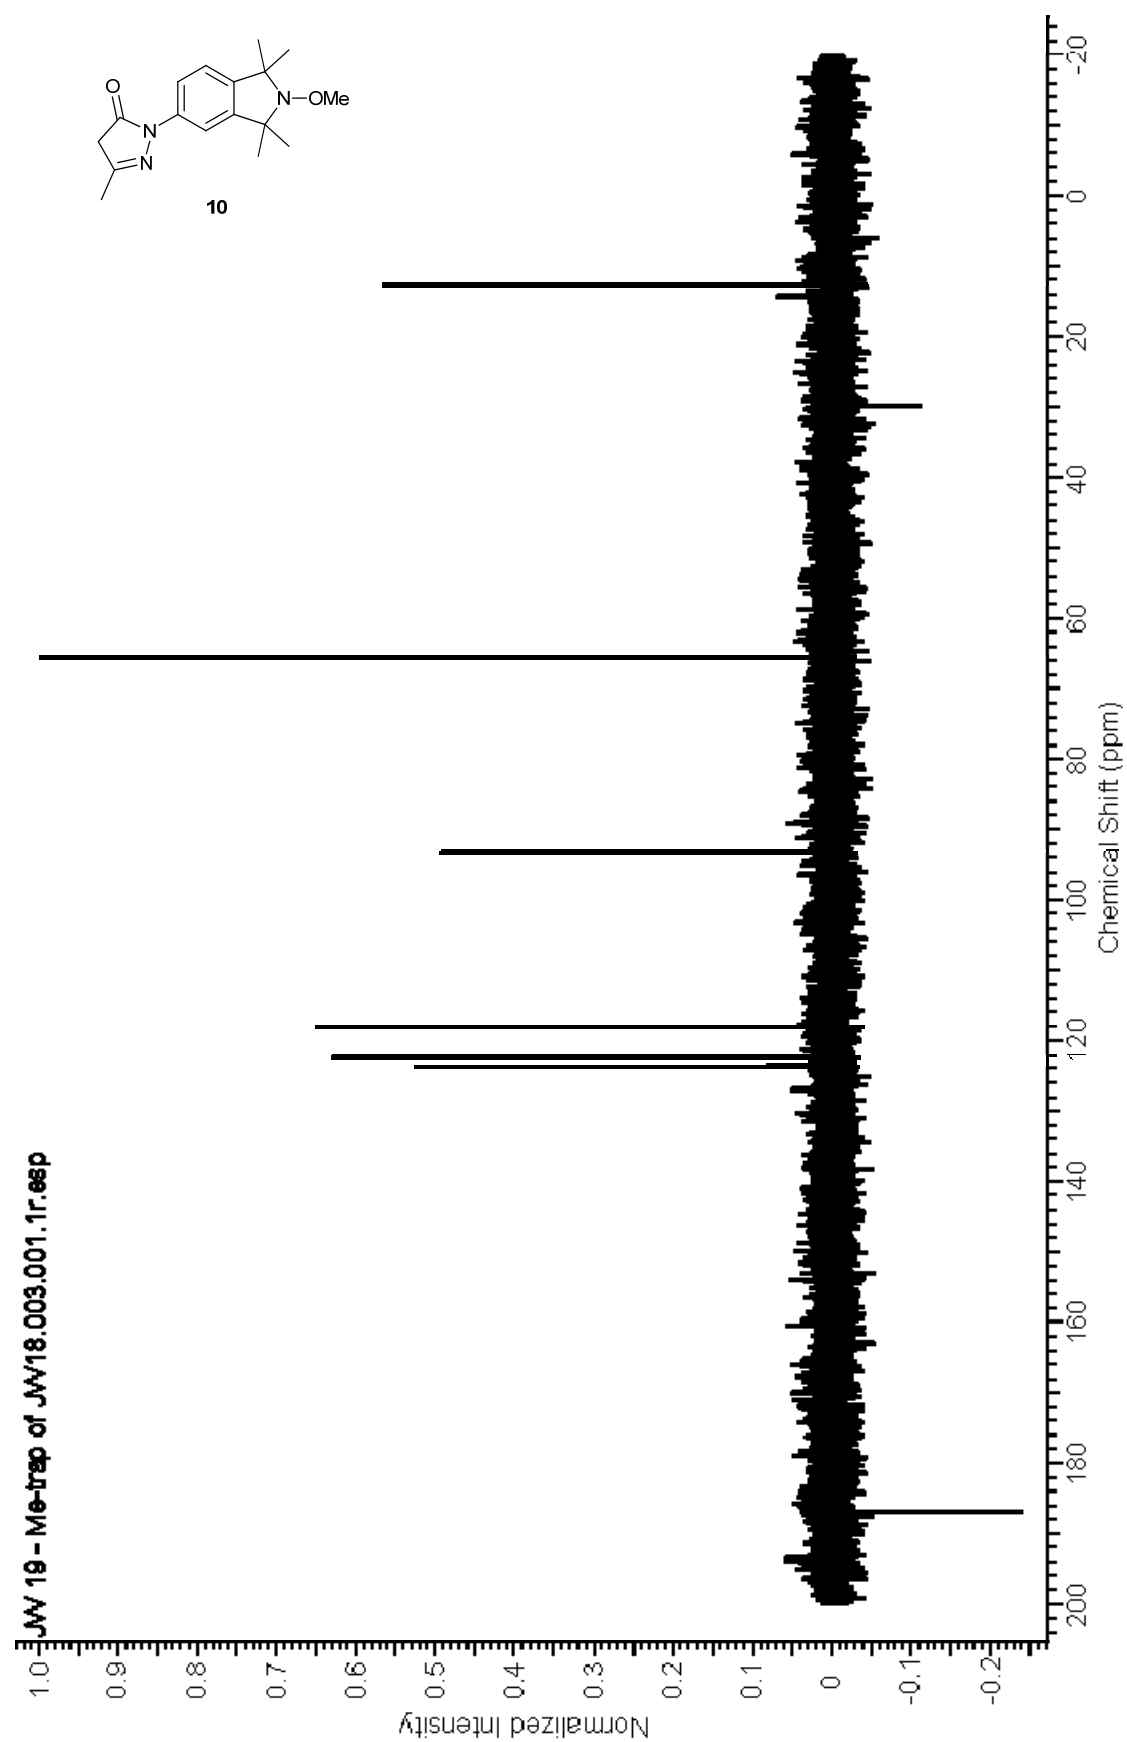

**Figure S6.** 5-(3-Methyl-pyrazol-5-ol-1-yl)-2-methoxy-1,1,3,3-tetramethylisoindoline **10**, EI-mass spectrum

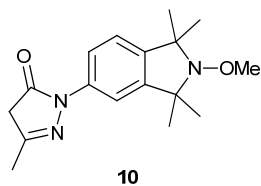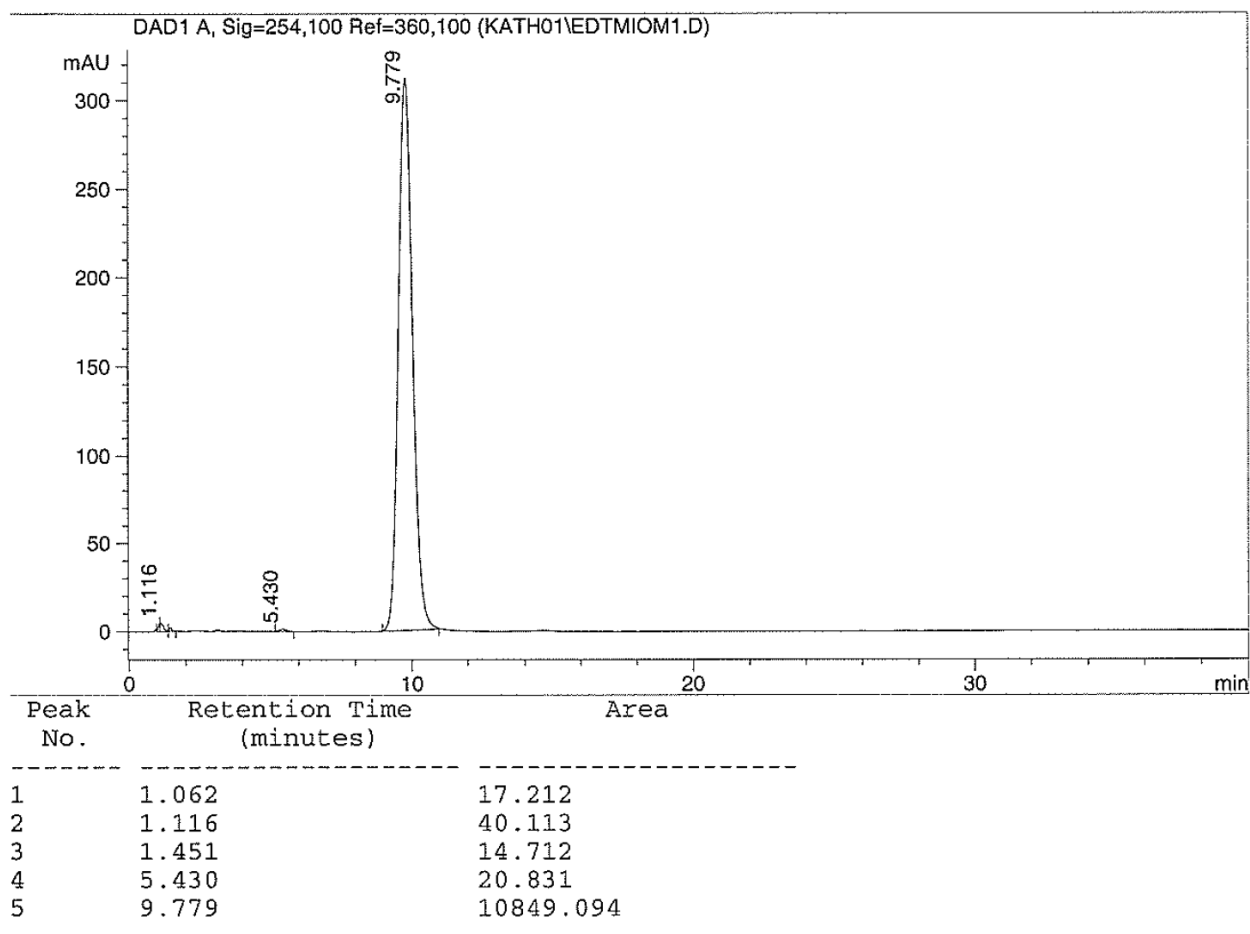

**Figure S7.** 5-(3-Methyl-pyrazol-5-yl-1-yl)-2-methoxy-1,1,3,3-tetramethylisoindoline **10**, analytical HPLC chromatogram

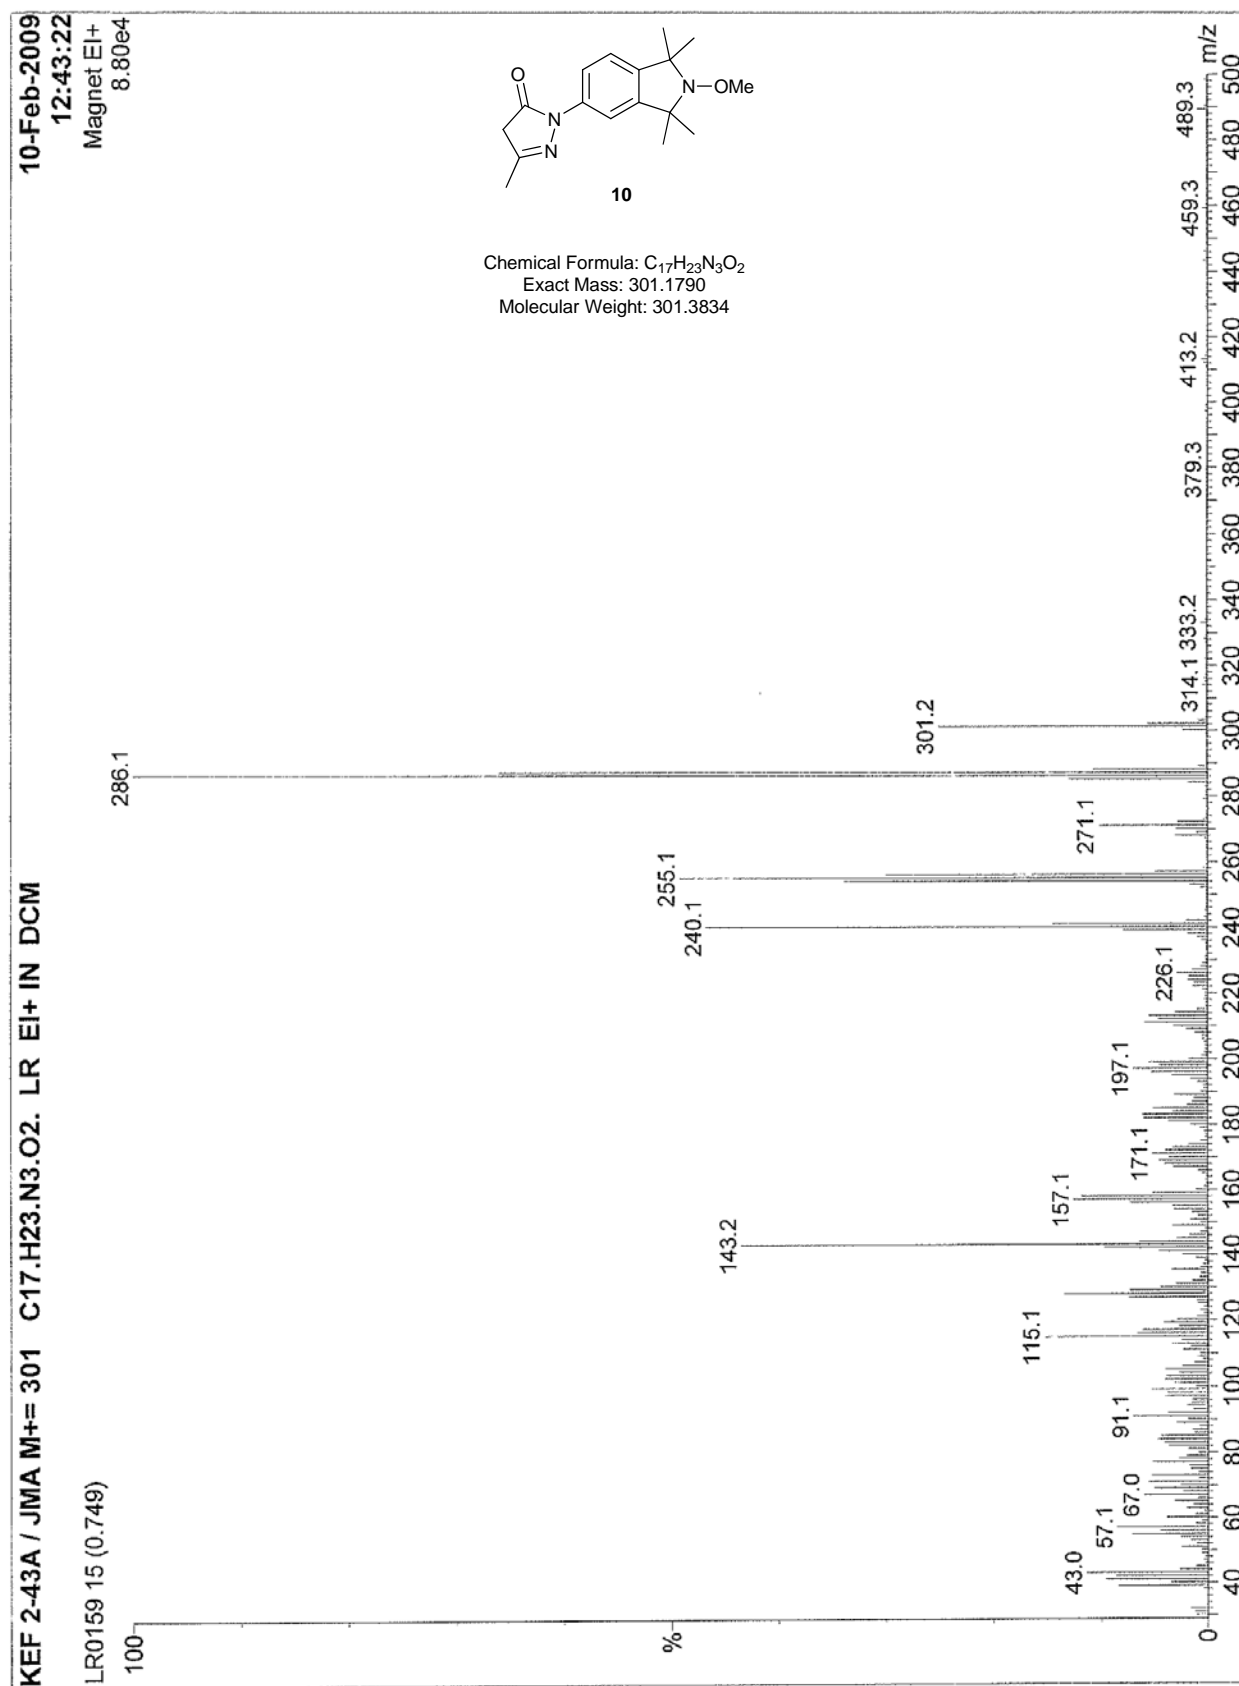



**Figure S8.** Comparison of  $^{13}\text{C}$  DEPT NMR spectra (100 MHz) for 5-(3-methyl-pyrazol-5-yl-1-yl)-2-methoxy-1,1,3,3-tetramethylisoindoline **10** and edaravone (3-methyl-1-phenyl-2-pyridazin-5-one) **1** in  $\text{CDCl}_3$

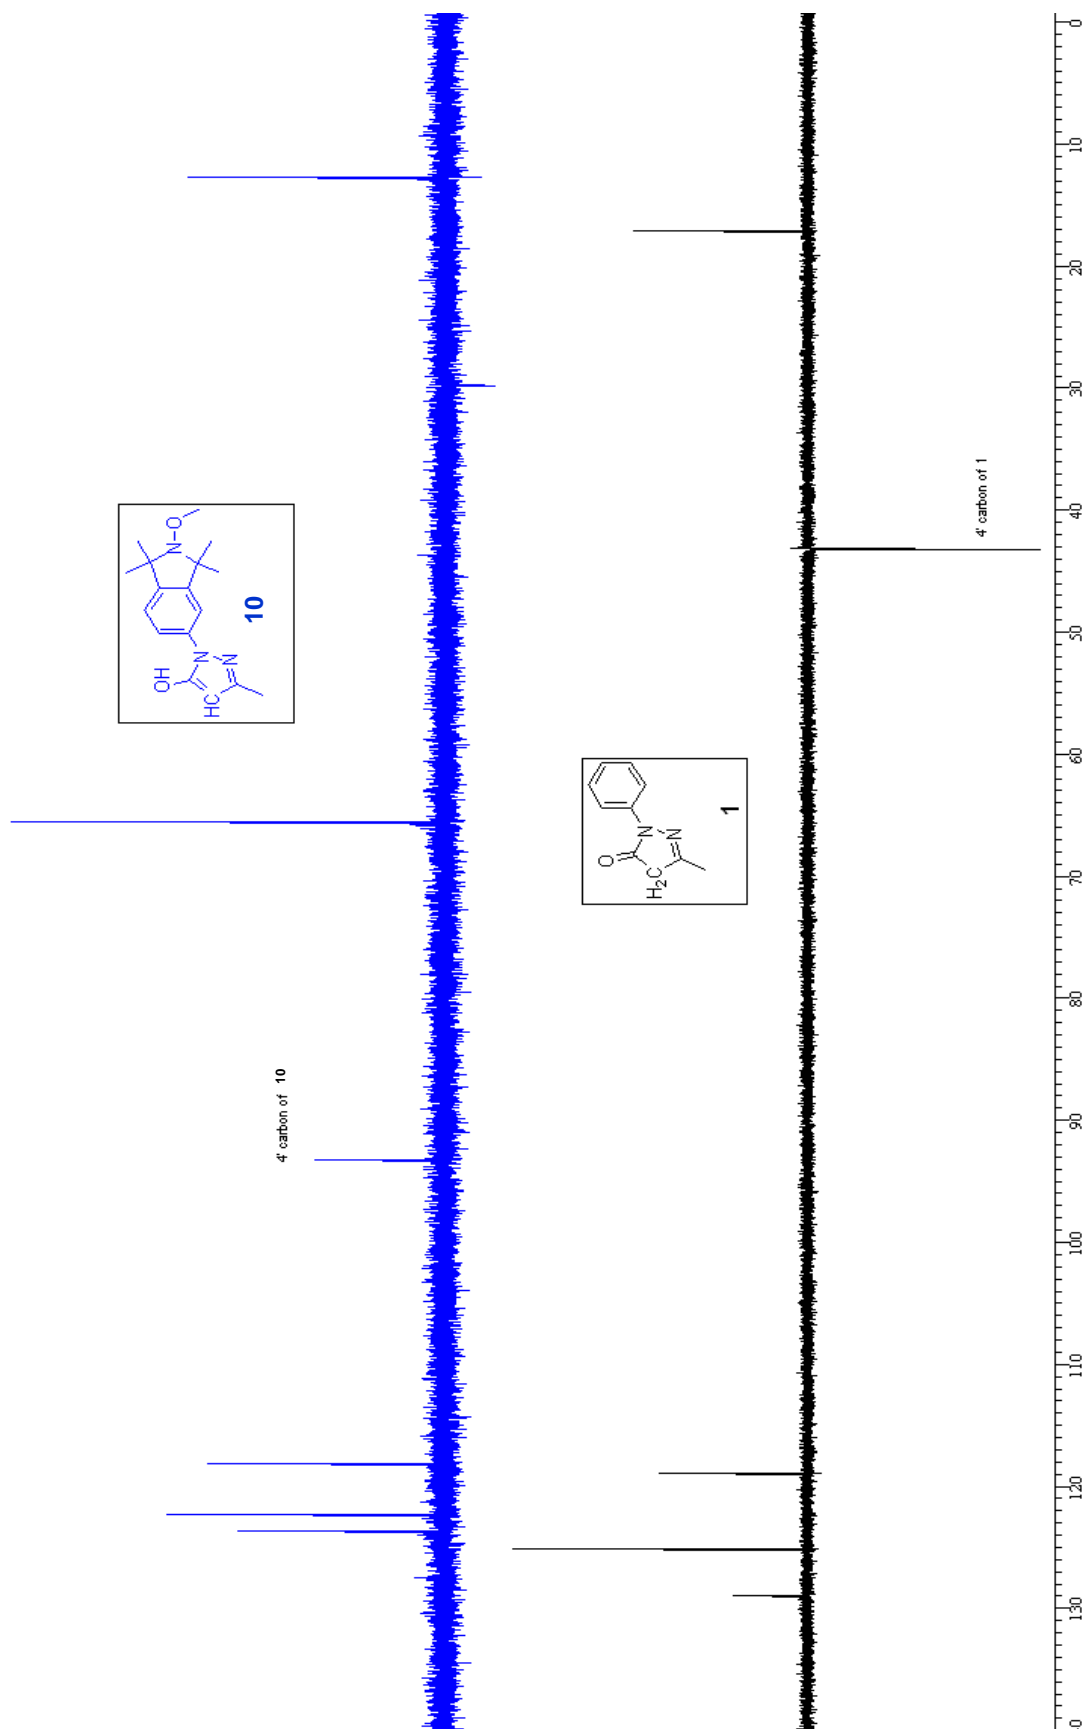

Supplement: c1md00041a.pdf [file c1md00041a.pdf]
